# Supplementary material
Source: Elsevier journal article supplement (https://www.sciencedirect.com/science/article/pii/S0300893221004103)
Supplement: mmc1 [file mmc1.pdf]

## MATERIAL ADICIONAL

El autor PARA correspondencia confirma que el grupo RE-HEART en su conjunto avala el presente trabajo.

### Investigadores del grupo del registro RE-HEART (en orden alfabético por centro)

| Centro                                                            | Investigadores                                                                                                                                     |
|-------------------------------------------------------------------|----------------------------------------------------------------------------------------------------------------------------------------------------|
| Hospital Universitario 12 de Octubre (Madrid): centro coordinador | Fernando Arribas Ynsaurriaga<br>Javier de Juan Bagudá<br>Noelia de la Torre<br>Juan F. Delgado Jiménez<br>Catalina Munera<br>Rafael Salguero Bodes |
| Clínica Universidad de Navarra (Pamplona)                         | Juan J. Gavira Gómez<br>Ignacio García Bolao<br>Javier Muñiz Saenz-Díez<br>Nahikari Salterain González                                             |
| Complejo Hospitalario Universitario de Toledo (Toledo)            | Miguel Ángel Arias<br>Gerard Loughlin<br>Marta Pachón Iglesias<br>Paula Sánchez-Aguilera                                                           |
| Hospital Universitario Virgen Macarena (Sevilla)                  | Pablo Bastos Amador<br>Rocío Cózar León<br>Ernesto Díaz Infante<br>Álvaro Izquierdo Bajo.                                                          |
| Hospital Universitario de Basurto (Bilbao)                        | María F. Arcocha Torres<br>Vanessa Escolar Pérez                                                                                                   |
| Hospital Universitario La Paz (Madrid)                            | Óscar González Fernández                                                                                                                           |

|                                                                     |                                                                                                                                      |
|---------------------------------------------------------------------|--------------------------------------------------------------------------------------------------------------------------------------|
|                                                                     | <p>Ángel Manuel Iniesta Manjavacas</p> <p>Laura Peña Conde</p> <p>Inés Ponz de Antonio</p>                                           |
| Hospital Universitario Vall d'Hebron<br>(Barcelona)                 | <p>Ana B. Méndez Fernández</p> <p>Jenson Maldonado</p> <p>Gabriel Pascual González</p> <p>Nuria Rivas Gándara</p>                    |
| Hospital Clínico San Carlos (Madrid)                                | <p>Jesús Flores Soler</p> <p>Josebe Goirigolzarri Artaza</p> <p>Nicasio Pérez Castellano</p> <p>María Alejandra Restrepo Córdoba</p> |
| Hospital Universitario Central de Asturias<br>(Oviedo)              | <p>Daniel García Iglesias</p> <p>Erika García Suárez</p> <p>Beatriz Díaz Molina</p> <p>José M. Rubín López</p>                       |
| Hospital General Nuestra Señora del Prado<br>(Talavera de la Reina) | <p>Alfonso Macías Gallego</p> <p>Inés Madrazo Delgado</p>                                                                            |
| Hospital General La Mancha Centro (Alcázar<br>de San Juan)          | <p>Manuel J. Fernández-Anguita</p> <p>Virgilio Martínez Mateo</p>                                                                    |
| Hospital General Universitario de Alicante<br>(Alicante)            | <p>Juan G. Martínez Martínez</p> <p>Pablo Ramos Ruiz</p>                                                                             |
| Hospital Universitario Insular (Gran<br>Canaria)                    | <p>Natalia Marrero Negrín</p> <p>José María Medina Gil</p> <p>Olga Medina Moreno</p>                                                 |
| Hospital Universitario Ramón y Cajal<br>(Madrid)                    | <p>Gonzalo L. Alonso Salinas</p> <p>Jesús Álvarez-García</p> <p>David Cordero Pereda</p> <p>Teresa Hernández Las Heras</p>           |

|                                                                  |                                                                                                |
|------------------------------------------------------------------|------------------------------------------------------------------------------------------------|
| Hospitales Universitarios de Torrevieja y<br>Vinalopó (Alicante) | Adriana Dávila Arias<br>Carlos de Diego Rus<br>Luis González Torres<br>Patricia Gracia Pomares |
|------------------------------------------------------------------|------------------------------------------------------------------------------------------------|

# **Tabla 1 del material adicional**

Preguntas que realizar en la entrevista telefónica del paciente que entra en periodo de alerta de HeartLogic

|                                                                                                                                    |
|------------------------------------------------------------------------------------------------------------------------------------|
| ¿Ha ganado peso rápidamente? (> 1 kg diario o > 2 kg en 3 días)?                                                                   |
| ¿Han aumentado los edemas de las extremidades inferiores?                                                                          |
| ¿Presenta distensión abdominal?                                                                                                    |
| ¿Ha disminuido el volumen de diuresis?                                                                                             |
| ¿Presenta mayor grado de disnea?                                                                                                   |
| ¿Ha aumentado la ortopnea?                                                                                                         |
| ¿Presenta disnea paroxística nocturna?                                                                                             |
| ¿Tiene tos con el decúbito?                                                                                                        |
| ¿Ha presentado mareo u obnubilación?                                                                                               |
| ¿Presenta astenia?                                                                                                                 |
| ¿Ha tenido palpitaciones?                                                                                                          |
| ¿Ha tenido dolor torácico?                                                                                                         |
| ¿Ha presentado cambios significativos de la presión arterial o la frecuencia cardiaca?                                             |
| ¿Ha cometido transgresión dietética?                                                                                               |
| ¿Ha cometido transgresión medicamentosa?                                                                                           |
| ¿Ha tenido náuseas, vómitos o diarrea?                                                                                             |
| ¿Muestra algún signo de infección (tos, odinofagia, fiebre, disuria...)?                                                           |
| ¿Ha aumentado de forma significativa la tensión emocional?                                                                         |
| ¿Presenta alguna otra circunstancia que pudiera relacionarse con la alarma como cambios de rutinas, viajes, eventos familiares...? |
